# Supplementary material
Source: PubMed Central journal article supplement (PMC6256349)
Supplement: es8b03180_si_002.pdf [file es8b03180_si_002.pdf]

## **Supporting Information for:**

# Identification of glycoproteins isolated from extracellular polymeric substances of full-scale anammox granular sludge

*Marissa Boleij<sup>1</sup>, Martin Pabst<sup>1</sup>, Thomas R. Neu<sup>2</sup>, Mark C.M. van Loosdrecht<sup>1</sup>, Yuemei Lin<sup>1\*</sup>*

<sup>1</sup> Department of Biotechnology, Delft University of Technology, van der Maasweg 9, 2629 HZ, Delft, The Netherlands

<sup>2</sup> Department of River Ecology, Helmholtz Centre for Environmental Research – UFZ, Brueckstrasse 3A, 39114 Magdeburg, Germany

This Supporting Information contains: 12 pages with 3 supplemental materials and methods and 8 supplemental figures. In addition, 4 supplemental tables provided separately in excel files.

---

\* **Corresponding author:** Yuemei Lin, Yuemei.Lin@tudelft.nl

## Content Supplemental material

### Supplemental materials and methods

|                                                  |    |
|--------------------------------------------------|----|
| 1. Clone library analysis .....                  | S3 |
| 2. Fluorescent in situ hybridization (FISH)..... | S3 |
| 3. Parameters database search.....               | S4 |

### Supplemental Figures

|                                                                                                      |     |
|------------------------------------------------------------------------------------------------------|-----|
| Figure S1. FISH analysis.....                                                                        | S5  |
| Figure S2. Alignment WP_07006018.1 and WP_07006019.1.....                                            | S6  |
| Figure S3. InterPro sequence analysis of WP_07006018.1.....                                          | S7  |
| Figure S4. InterPro sequence analysis of S-layer protein of <i>K. stuttgartiensis</i> .....          | S8  |
| Figure S5. GT motif in sequence WP_07006018.1 and S-layer protein of <i>K. stuttgartiensis</i> ..... | S9  |
| Figure S6. Sequence hypothetical protein <i>B. sapporoensis</i> (WP_07006018.1) in NCBI.....         | S10 |
| Figure S7. Glycopeptide analysis CID.....                                                            | S11 |
| Figure S8. Results of the BLAST search with sequence WP_07006018.1.....                              | S12 |

### Supplemental Tables (Supplementary Tables S1-4 are provided in one separate excel file )

Table S1. Bacteria wide database analysis

Table S2. Human and Crapome database analysis

Table S3. Brocadia database analysis

Table S4. WP\_070066018.1 focused analysis

## Supplemental materials and methods

### 1. Clone library analysis

DNA was extracted from sludge sample with FastDNATM 2 mL SPIN Kit for Soil (MP Biomedicals, USA). 16s rRNA gene was amplified from total DNA (forward primer 5'-RCATGCAAGTCGAACGWG-3' and reverse primer 1492R: – 5'-ACCTTGTTACGACTT-3') with Taq DNA polymerase using the following PCR condition: 5 min initial denaturation at 94°C, 25 cycles of 1 min at 94°C, primer annealing for 1 min at 50°C and 70s at 72°C. Final extension was carried out for 4 min at 72°C. The PCR products were checked on a 1% electrophoresis agarose gel and cloned by using the TOPO TA cloning system. For each sample, 30 colonies were picked and purified for Sanger sequencing. Full length sequences were compared with similar sequences of references species by BLASTN search and grouped into same OTU based on highest percentage similarity. The sequences were checked for chimeric artefacts by decipher online tool (<http://decipher.cee.wisc.edu/FindChimeras.html>). Sequences were aligned by SINA online tool (<https://www.arb-silva.de/>).

### 2. Fluorescent In Situ Hybridization (FISH)

Fluorescent In Situ Hybridization (FISH) was performed as described by Johnson et al (2009). Before fixation, the granules were homogenized using a potter homogenizer. The following FISH probes were applied: EUB338 (Amann et al., 1990) to target all bacteria, Amx820 (Schmid et al., 2001) to target “*Candidatus (Ca.) Brocadia*” and “*Ca. Kuenenia*” species, Kst157 (Schmid et al., 2001) to target “*Ca. Kuenenia stuttgartiensis*” and Bfu613 (Kartal et al., 2008) to target “*Ca. Brocadia fulgida*”. The TestProbe tool from SILVA (<https://www.arb-silva.de/search/testprobe/>) confirmed that Bfu613 can also target with “*Ca. Brocadia sp.40*”, that is renamed to “*Ca. Brocadia Sapporoensis*”. Details on oligonucleotide probes are available at probeBase (Greuter et al., 2016).

### References:

- Amann, R. I., Binder, B. J., Olson, R. J., Chisholm, S. W., Devereux, R., and Stahl, D. A. (1990). Combination of 16S rRNA-targeted oligonucleotide probes with flow cytometry for analyzing mixed microbial populations. *Appl. Envir. Microbiol.* 56, 1919–1925. Available at: <http://aem.asm.org/cgi/content/long/56/6/1919>.
- Greuter, D., Loy, A., Horn, M., and Rattei, T. (2016). probeBase—an online resource for rRNA-targeted oligonucleotide probes and primers: new features 2016. *Nucleic Acids Res.* 44, D586–D589. doi:10.1093/nar/gkv1232.
- Johnson, K., Jiang, Y., Kleerebezem, R., Muyzer, G., and van Loosdrecht, M. C. M. (2009). Enrichment of a mixed bacterial culture with a high polyhydroxyalkanoate storage capacity. *Biomacromolecules* 10, 670–6. doi:10.1021/bm8013796.
- Kartal, B., Van Niftrik, L., Rattray, J., Van De Vossenberg, J. L. C. M., Schmid, M. C., Sinnighe Damsté, J., et al. (2008). *Candidatus “Brocadia fulgida”*: An autofluorescent anaerobic ammonium oxidizing bacterium. *FEMS Microbiol. Ecol.* 63, 46–55. doi:10.1111/j.1574-6941.2007.00408.x.
- Schmid, M., Schmitz-Esser, S., Jetten, M., and Wagner, M. (2001). 16S-23S rDNA intergenic spacer and 23S rDNA of anaerobic ammonium-oxidizing bacteria: Implications for phylogeny and in situ detection. *Environ. Microbiol.* 3, 450–459. doi:10.1046/j.1462-2920.2001.00211.x.

### 3. Parameters database searches

PEAKS Studio 8.5 analysis using a bacteria-wide sequence database (Bacteria proteome collection, downloaded from UniprotKB, containing 61994821 Protein sequences, unreviewed and reviewed).

Database search was performed using the following parameters: Parent Mass Error Tolerance: 10 ppm, Fragment Mass Error Tolerance: 0.5 Da, Precursor Mass Search Type: monoisotopic, Enzyme: Trypsin, Max Missed Cleavages: 1, Non-specific Cleavage: none, Fixed Modifications: Carbamido-methylation, Variable Modifications: Oxidation, Max Variable PTM Per Peptide: 1, FDR Estimation: Enabled, Precursor Options: corrected, Charge Options: no correction. Peptide  $-10\lg P$  threshold was set to  $\geq 42.2$ , Peptide Ascore  $\geq 0$ , Protein  $-10\lg P \geq 40$ , De novo ALC Score  $\geq 80\%$ . This resulted in identifications with a FDR (Peptide-Spectrum Matches) 0.0%, FDR (Peptide Sequences) 0.0%, FDR (Protein) 1.9%.

PEAKS Studio 8.5 analysis using a Candidatus Brocadia protein focused database (containing 16631 Protein sequences and the retracted WP\_070066018.1, unreviewed and reviewed).

Database search was performed using the following parameters: Parent Mass Error Tolerance: 10 ppm, Fragment Mass Error Tolerance: 0.5 Da, Precursor Mass Search Type: monoisotopic, Enzyme: Trypsin, Max Missed Cleavages: 1, Non-specific Cleavage: one, Fixed Modifications: Carbamido-methylation, Variable Modifications: Oxidation and Deamidation, Max Variable PTM Per Peptide: 1, FDR Estimation: Enabled, Precursor Options: corrected, Charge Options: no correction. Peptide  $-10\lg P$  threshold was set to  $\geq 37.1$ , Peptide Ascore  $\geq 0$ , Protein  $-10\lg P \geq 40$  with 1 unique peptide min, De novo ALC Score  $\geq 80\%$ . This resulted in identifications with a FDR (Peptide-Spectrum Matches) 0.0%, FDR (Peptide Sequences) 0.0%, FDR (Protein) 0.0%.

X!tandem (release ALANINE, The GPM) was used as confirmatory database search engine using the following parameters: Reversed sequences yes, Check parent ions for charges 1, 2 & 3 yes, Protein entries with a peptide  $\log(e) < -3$  and protein  $\log(e) < -5$ , Fragment mass error of 0.5 and  $\pm 10$  ppm parent ion mass error (LTQ-Orbitrap), isotope error yes, Fragment type, monoisotopic, Parent mass detection no, max parent charge: 4, minimum parent M+H= 500 Da, Minimum fragment ion = 150 Da, Total peaks: 50, minimum peaks 15, Fragment types: b/y ions, Fixed modification: Carbamidomethyl, Variable modification none, refinement no, Cleavage site Trypsin, Missed cleavage sites allowed 1, Semi-cleavage was used optional, Glycan mass was included optionally into database searches.

## Supplemental figures

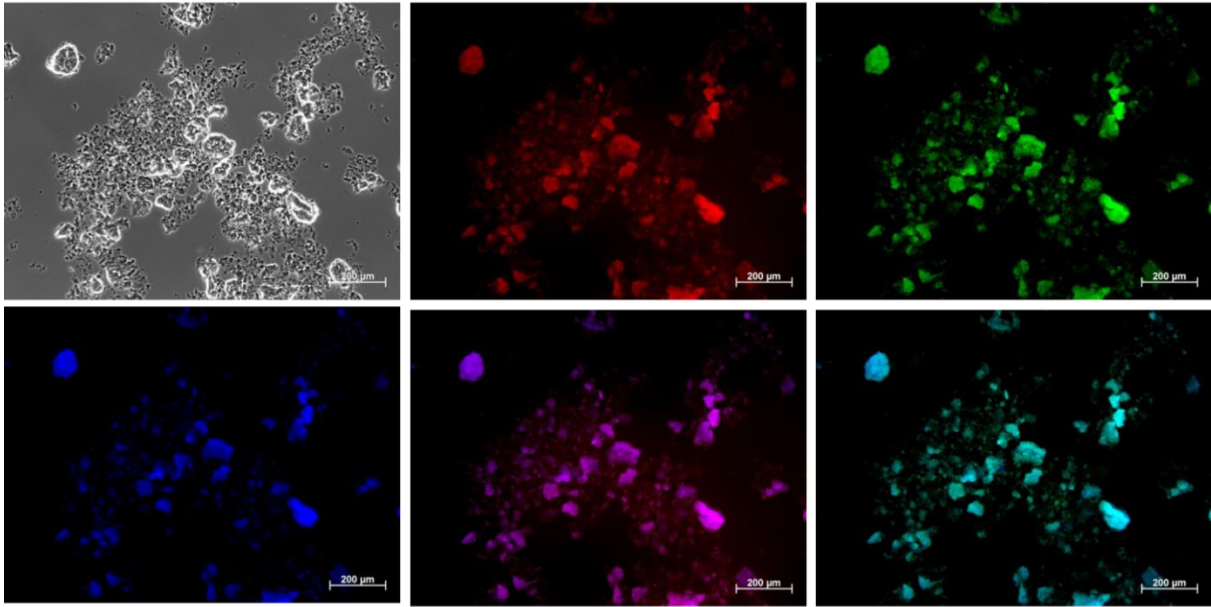

**Figure S1.** Fluorescent In Situ Hybridization (FISH) was performed as described by Johnson et al (2009). Before fixation, the granules were homogenized using a potter homogenizer. The following FISH probes were applied: EUB338 (Amann et al., 1990) to target all bacteria, Amx820 (Schmid et al., 2001) to target "*Candidatus (Ca.) Brocadia*" and "*Ca. Kuenenia*" species, Bfu613 (Kartal et al., 2008) to target "*Ca. Brocadia fulgida*" and Kst157 (Schmid et al., 2001) to target "*Ca. Kuenenia stuttgartiensis*". Details on oligonucleotide probes are available at probeBase (Greuter et al., 2016). FISH results were positive for EUB (Blue), AMX820 (green) and BFU613 (red), and negative for: Kst157 and Amx1015. The BFU613 was designed for hybridization with "*Ca. Brocadia fulgida*". The TestProbe tool from SILVA (<https://www.arb-silva.de/search/testprobe/>) shows that this probe can also hybridize with "*Ca. Brocadia sp.40*".

## Alignments

hypothetical protein [Candidatus Brocadia sapporoensis]

Sequence ID: WP\_070066018.1 Length: 498 Number of Matches: 2

Range 1: 9 to 497

| Score          | Expect | Method                                                         | Identities   | Positives    | Gaps       | Frame |
|----------------|--------|----------------------------------------------------------------|--------------|--------------|------------|-------|
| 659 bits(1701) | 0.0()  | Compositional matrix adjust.                                   | 351/489(72%) | 389/489(79%) | 34/489(6%) |       |
| Features:      |        |                                                                |              |              |            |       |
| Query          | 43     | MICAIFFSLIVMISQAGAWDILTLDNSNGDPGEFAAITTGTSGASYISHYDDRAYGTLKYTT | 102          |              |            |       |
| Sbjct          | 9      | MICAIFFSL VMISQA AW+ILTLD GD G+F AITTGTSGASYIS+YD+ LKY T       | 68           |              |            |       |
| Query          | 103    | NVSGTWTITLDSNGNVGRYTSIDVGTSGASYISYYDFTNEDLKYATNVSGTWKTYTLVNS   | 162          |              |            |       |
| Sbjct          | 69     | NISGTWTQTLDNTGNVGRFTSIDVGTSGALYISYYDVTSEDLKYATNVSGTWTYAVNS     | 128          |              |            |       |
| Query          | 163    | HNKVGREFSGIKVGTSGAAYISYYDTAGDLRYATNVSGSWEITDVTAGNVGQYASIVV     | 222          |              |            |       |
| Sbjct          | 129    | +N+VGRFSGIKVGTSGAAYIS+YYDTA DLRYATNVSG W +TT+VDTAG+VGQY SIVV   | 188          |              |            |       |
| Query          | 223    | GTSGASHISYYDVTNGNLKCATNVSGAWTETLDSGDVGVQYTSIAMGTSGALYISYYDV    | 282          |              |            |       |
| Sbjct          | 189    | GTSGAS+ISYYD TN +LK AT+ +G WTTETLDS G VGQYTSIAMGTSGALYISYYD    | 248          |              |            |       |
| Query          | 283    | THGDLKYATNVSGTWTETLDSGDVGVQYTSIAMGTSGASYISYYDVTHGDLKCATNISG    | 342          |              |            |       |
| Sbjct          | 249    | T+G+LK ATN++GTWTT T+DS G+VGQYTSIA+GTSGA YISYYD + DL+ ATN SG    | 308          |              |            |       |
| Query          | 343    | TWTFEAVDSDNKVGINSISVGLSGDVHICCHDDTDHTLKYASNFE-----             | 388          |              |            |       |
| Sbjct          | 309    | TWT E VDS+ VG SSISVGLSGDV+I +DDT+ LKYA E                       | 368          |              |            |       |
| Query          | 389    | -----AYEAPPPPPCKVKKLNKPKSLKLSQGEDAGKTVTLTCKD                   | 428          |              |            |       |
| Sbjct          | 369    | +P P PC KKLNVKPKSLKLSQGED KTV LTCKD                            | 428          |              |            |       |
| Query          | 429    | GFPSVNQPVKAKVMSGKKCVSVPSPAEVSTNEDGQATFTITATNKGTAVVRFKHKNLVGD   | 488          |              |            |       |
| Sbjct          | 429    | GFPSVNQPVKAK++SGKK V+VSPAE T+EDGQATFTITAT K GTAVVRFKHKNLVGD    | 488          |              |            |       |
| Query          | 489    | VTVKVKKVS 497                                                  |              |              |            |       |
| Sbjct          | 489    | VTVKVKK + 497                                                  |              |              |            |       |

Figure S2. Alignment of WP\_070066018.1 and WP\_070066019.1 using the BLAST tool of NCBI.

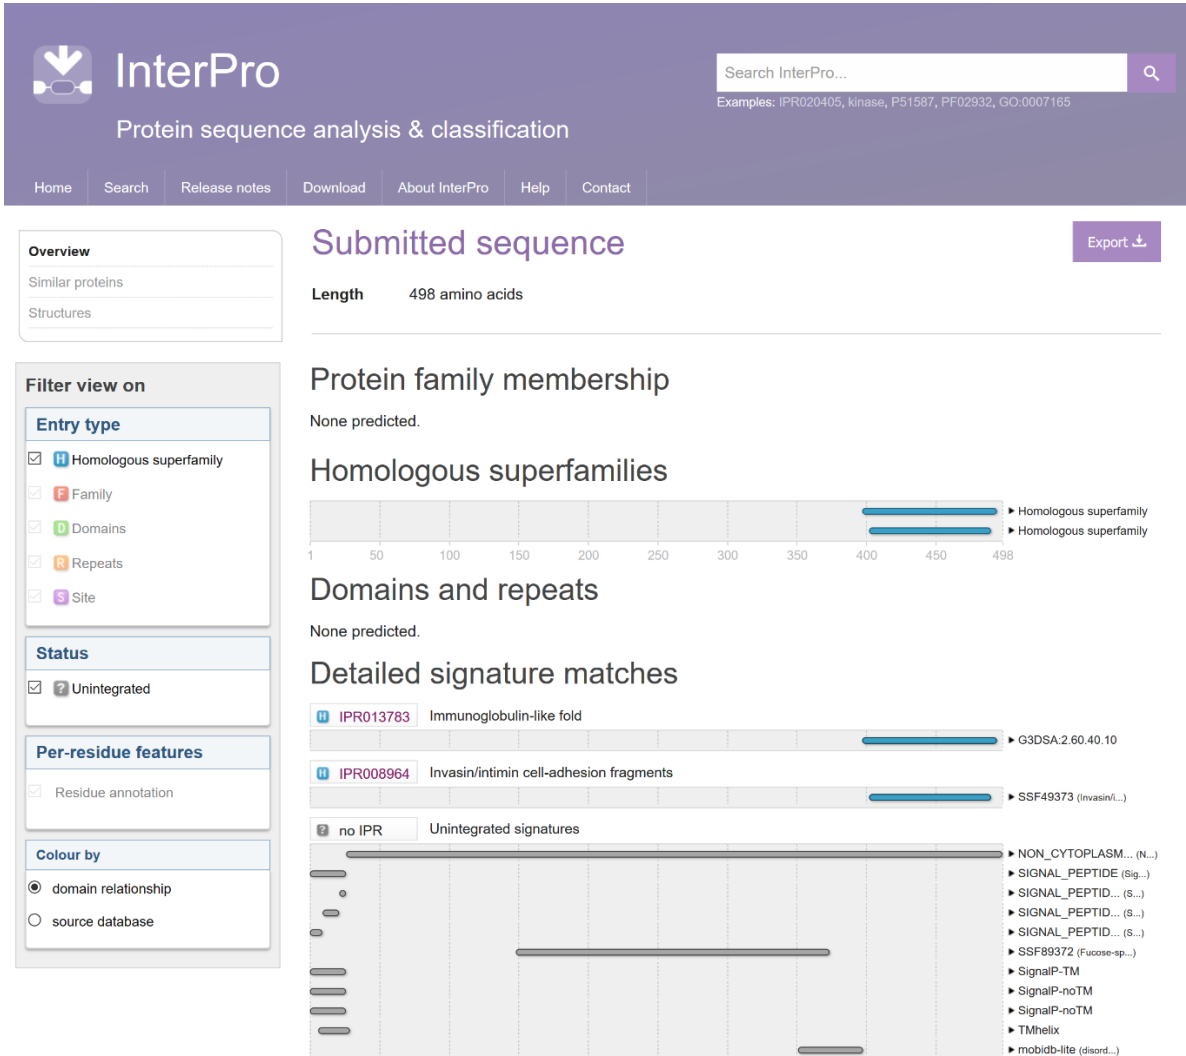

**Figure S3.** Printsreen of the results of the Interpro protein sequence analysis of WP\_07006018.1.

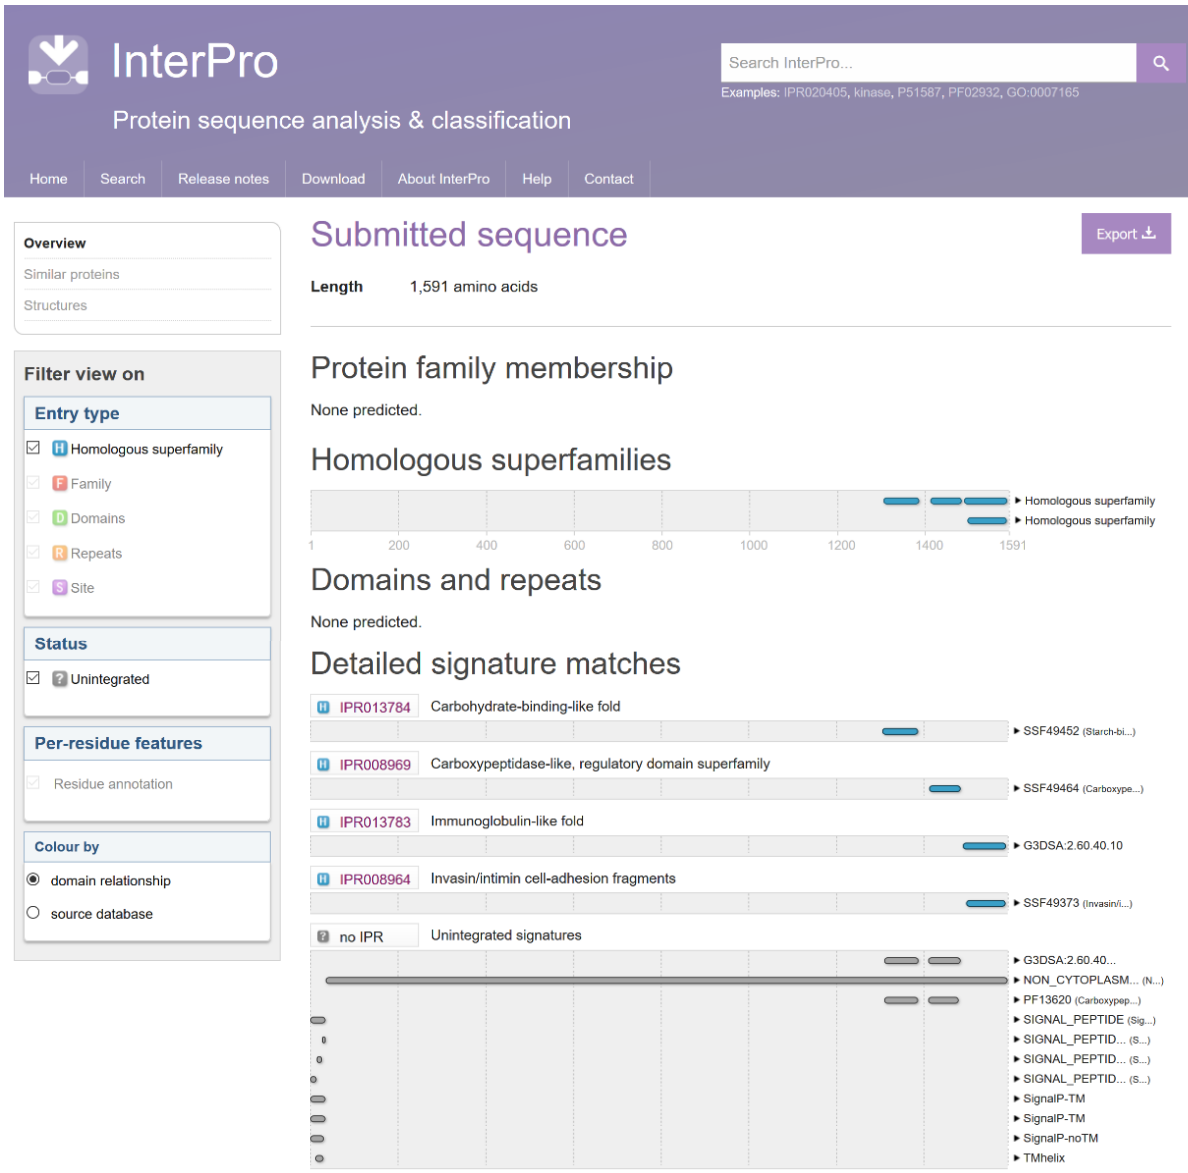

**Figure S4.** Printsreen of the results of the Interpro protein sequence analysis of S-layer “*Ca. Kuenenia stuttgartiensis*” (SOS03803).



```

>WP_070066018.1 hypothetical protein [Candidatus Brocadia sapporoensis]
MRKKQMGVMICAIFFSLAVMISQASAWNILTLDETDGVDGQFGAITTTGTSGASYISYYDNTNEDLKAYATNI
SGTWT'TQ'TLDNTGNVGRF'TSIDVGTSGALYISYYDVTSEDLKYATNVSGTW'TYAIVNSNNQVGRFSGIKV
GTSGAAYISFYD'TAFDLRYATNVSGLWVW'T'NVD'TAGSVGQY'TSIVVGTSGASYISYYDD'T'N'DLKAYAT
DATGTW'TTETLDSTGKVGQY'TSIAMGTSGALYISYYDE'TNGNLKLATNLAGTWT'TGTVDSTGNVGQY'TSI
AVGTSGALYISYYDFDNKDLRYATNASGTW'TTETVDSDDDVGQFSSISVGLSGDVNI'SYYDD'T'NKNLKYA
FKSETGVPPTPTATPTPTGTPTPTPTSTATPTPTGTPTPTPSPTPVPCNAKKNVVKPKSLKLSQGEDTEK
TVILTCKDGFPSVNQPVKAKIVSGKKEFVTVSPAAYTDEDGQATF'TITATEKKGTAVVRFKHKNLVGDVT
VKVKKATE

>SOH03803.1 S-layer protein [Candidatus Kuenenia stuttgartiensis]
MKRPGILNLKGNWLSMAGVLEFIMLALVMGVASNAKAATGSFDRDRYLPEKAGGNDYDRAWISVTDSSGNTT
SSPD'TITVTVRAGVDDATSFILLE'TGNT'STVF'TTTGTVQPNYRALGT'TSGYVEDLAGSYWYSVLGNSIVG
LDLRLNAANIGGNAQSATSGDLKVAEGSTLELLYGGSTLDTATVGFNSGSISSSPSSV'TSVEGLPSNGNI
ILSISDPDENLNPVVRDVI'GFYDGF'TTGD'TRGTASSMVQISAVDQSSD'TGD'TLSLGT'SIVARHIMLVE'T
GNNTGVFTASGYVYGT'TT'TVAASDLVGNLKVGSSESYQGQDITLGA'GT'VSCTFRIVEANANGGIALIY
NGTSTETYGT'VSVVEDATSA'PRADV'GASLVA'FGTSSLSLGD'TQ'TGHKVV'CYGTQ'TSTGYAVSAWGLPSSS
SNYAATGSKLVKLM'DGSSYCLIAVSS'FSTPNDSAGLGT'EGDIIANS'GYGSVSVV'EDGFRLV'GPRDGLTK
VSYLDLLKSNQAGT'VSANISFGIAGKT'GELSVDK'TTVDINDFLTVTVID'DNLTSSST'SQSVGEDSWNG
TTTAERGDRLKVAAYSSSGEGVGNALSLSFKDGT'SVGTSSAIRVSN'TDNSL'VWIIPKDPSSGYIGT'PGT
RSSSAGSATF'TLGTQSVDTN'ALMKGASSA'AKSFLSSAT'TSS'FVATLDGLGD'TVEISPDGT'RWIAIPVTE'T
GANSATFVGT'VGF'DYTAARV'TTDT'TL'TR'TTAFSD'STDY'TTIT'FANSEFNST'NRLDSEFGT'GSVVRV'RDF
SQEFQEVVSVAGSTMV'TKLASST'SF'TPYKT'WIQVIGNDM'TTAREDTLSNGAKVFRIGGF'GATYRIRYN
DAKDADGN'YKAGDTLAATASDVGFQ'TYD'GELSTNVSGTIGPNQYVVV'TLVDEDLNT'STSSKQ'TTSEPDRT
ESGT'RYVTFY'NENGLGNPVGSST'SNAPDGL'FKNGF'TAKVLYASKLSNVLSSSV'DQSSNTID'FKLEETAVN
SGT'FKGSFQLSSSSSTL'NSSDRLQVSSGDSIYVHYNDSPSATAEDNSTNYRVV'GPLS'IETSI'GSLLLSKA
KAYLSGD'TVVVSVVDDQNT'TSQD'TLTDK'LKIEGSNYSTGGAL'TLDLVE'SGNTSGT'FLATF'TTGT'ETVE
TSANL'GKVKAQEGGVVTVTYTDSSPSNT'TVTE'TLSFGSYDATIEFNADSYGLGT'YAIV'TLADAERNTSHT
GT'ETLLDDVFIQ'TSSVNST'KMRLVE'TGNDTGT'FVGSILV'TSSGATTEFNQIQGAEGETLTVTYSDTINTT
SS'RTVTD'TAAITAAV'TPSPTPTPGV'TPTPGITPTPTPGLTPTPSLIPGLGSVEGFVTDAA'TGDGIEGATVR
NQSGIYTD'TDADGFYSIANVEAGT'RTF'TAVALGYVPSAPTAIVV'TAGGT'TNLDFALVASVQGT'PI'TTPT
VTPPPATL'VVAVADGDGPIAGATVTVDGQSGVTDASGGATF'TLEAGDYEVSVSATDYLT'SVVTVTVTP
PVTILPV'TLEPKGPCPEPDEAVASAA'TVTPD'SLSLTKGDSE'DVIVLV'TDEDGCPAQGVKVKRKL'TSANKK
KIKVTPASETTDT'SGQATF'TVKAKKSKGKANV'KFAVKGVKDKPKVNV'TLAK

```

**Figure S5.** The GT motif highlighted in the sequences of the best matched protein and in the S-layer protein of “*Ca. Kuenenia stuttgartiensis*”.

Protein

GenPept

This record is a non-redundant protein sequence. Please [read more here](#).

### hypothetical protein [Candidatus Brocadia sapporoensis]

NCBI Reference Sequence: WP\_070066018.1

**Record removed.** This protein record was suppressed because it is no longer annotated on any genome

[Identical Proteins](#) [FASTA](#) [Graphics](#)

---

Go to:

LOCUS WP\_070066018 498 aa linear BCT 11-JAN-2018  
DEFINITION hypothetical protein [Candidatus Brocadia sapporoensis].  
ACCESSION WP\_070066018  
VERSION WP\_070066018.1  
KEYWORDS RefSeq.  
SOURCE Candidatus Brocadia sapporoensis  
ORGANISM [Candidatus Brocadia sapporoensis](#)  
Bacteria; Planctomycetes; Planctomycetia; Candidatus Brocadiales;  
Candidatus Brocadiaceae; Candidatus Brocadia.  
COMMENT REFSEQ: This record represents a single, non-redundant, protein  
sequence which may be annotated on many different RefSeq genomes  
from the same, or different, species.  
COMPLETENESS: full length.  
FEATURES Location/Qualifiers  
source 1..498  
/organism="Candidatus Brocadia sapporoensis"  
/db\_xref="taxon:392547"  
[Protein](#) 1..498  
/product="hypothetical protein"  
/calculated\_mol\_wt=52861  
ORIGIN  
1 mrkkqmgvmi caiffslavm isqasawnil tldetgdvqg fgaittgtsq asyisydynt  
61 nedlkyatni sgtwtqtld ntgnvgrfts idvgtsgaly isyydvtsed lkyatnvsgt  
121 wtyaivnsnn qvgrfsgikv gtsgaayisf yydtafdlry atnvsglwv ttnvdtagsv  
181 ggytsivvgt sgasyisydy dtntdlkyat datgtwttd ldstgkvgyy tsiamgtsga  
241 lyisydyetn gnklatnia gtwtgtvds tgnvgqytsi avgtsgalyi syydfndkl  
301 ryatnasgtw ttetvdsddd vggfssisvg lsgdvnlsyy ddtknlkya fksetgvppt  
361 ptpatptpg tptptpsta tptgtptpt psptpvpcna kklvnpkal klsqgedtek  
421 tviltokdgi psvngpvkak ivsgkkfvtv spaeytded gqatftitat ekkgtavvrf  
481 khknlvgdvt vkvkkate  
//

**Figure S6.** Best matched protein (WP\_070066018.1). Printsreen of the information of the protein in the NCBI database ([https://www.ncbi.nlm.nih.gov/protein/WP\\_070066018.1?report=fasta](https://www.ncbi.nlm.nih.gov/protein/WP_070066018.1?report=fasta)).

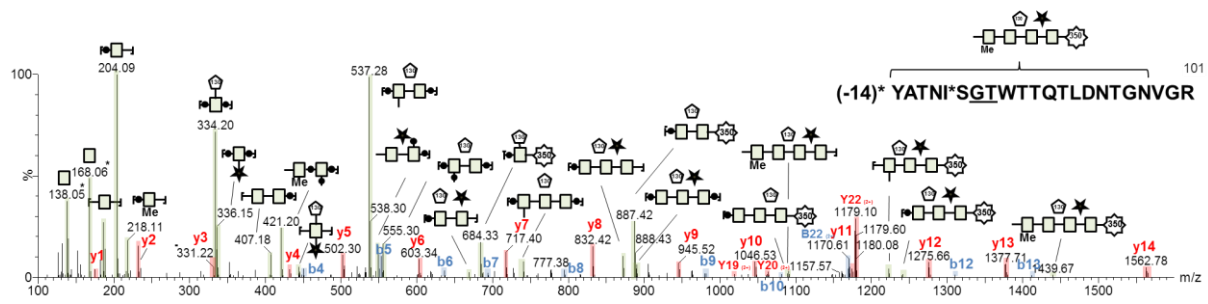

**Figure S7.** In-gel trypsin digestion and site-specific glycopeptide analysis. Analysis at higher collision energy using a Q-TOF mass spectrometer provides a more complete sequence assignment for both peptide backbone and O-glycan

Select: [All](#) [None](#) Selected:0

| Alignments <span>Download</span> <span>GenPept</span> <span>Graphics</span> <span>Distance tree of results</span> <span>Multiple alignment</span> |                                                                                                    |           |             |             |         |       |                                |
|---------------------------------------------------------------------------------------------------------------------------------------------------|----------------------------------------------------------------------------------------------------|-----------|-------------|-------------|---------|-------|--------------------------------|
|                                                                                                                                                   | Description                                                                                        | Max score | Total score | Query cover | E value | Ident | Accession                      |
| <input type="checkbox"/>                                                                                                                          | <a href="#">hypothetical protein [Candidatus Brocadia sapporoensis]</a>                            | 660       | 660         | 98%         | 0.0     | 72%   | <a href="#">WP_070066019.1</a> |
| <input type="checkbox"/>                                                                                                                          | <a href="#">hypothetical protein B6D34_02820 [Candidatus Brocadia sp. UTAMX1]</a>                  | 650       | 650         | 97%         | 0.0     | 72%   | <a href="#">OQZ04487.1</a>     |
| <input type="checkbox"/>                                                                                                                          | <a href="#">hypothetical protein A2Y09_06060 [Planctomycetes bacterium GWA2_39_15]</a>             | 349       | 1076        | 96%         | 5e-108  | 47%   | <a href="#">OHB38428.1</a>     |
| <input type="checkbox"/>                                                                                                                          | <a href="#">hypothetical protein A3J73_00345 [Planctomycetes bacterium RIFCSPHIGHO2_02_FULL_3]</a> | 335       | 577         | 99%         | 1e-104  | 43%   | <a href="#">OHB86435.1</a>     |
| <input type="checkbox"/>                                                                                                                          | <a href="#">hypothetical protein UZ01_01292 [Candidatus Brocadia sinica]</a>                       | 333       | 1219        | 76%         | 2e-103  | 56%   | <a href="#">KXK30623.1</a>     |
| <input type="checkbox"/>                                                                                                                          | <a href="#">hypothetical protein [Candidatus Brocadia sinica]</a>                                  | 332       | 1220        | 76%         | 8e-103  | 56%   | <a href="#">WP_082059331.1</a> |
| <input type="checkbox"/>                                                                                                                          | <a href="#">hypothetical protein BROSI_A0470 [Candidatus Brocadia sinica JPN1]</a>                 | 332       | 1219        | 76%         | 9e-103  | 56%   | <a href="#">GAN31966.1</a>     |
| <input type="checkbox"/>                                                                                                                          | <a href="#">hypothetical protein B6D35_08465 [Candidatus Brocadia sp. UTAMX2]</a>                  | 329       | 1846        | 76%         | 1e-101  | 56%   | <a href="#">OQY99824.1</a>     |
| <input type="checkbox"/>                                                                                                                          | <a href="#">hypothetical protein B6D34_09185 [Candidatus Brocadia sp. UTAMX1]</a>                  | 328       | 1384        | 75%         | 1e-101  | 54%   | <a href="#">OQZ03019.1</a>     |
| <input type="checkbox"/>                                                                                                                          | <a href="#">hypothetical protein [Candidatus Brocadia sapporoensis]</a>                            | 320       | 1966        | 73%         | 2e-98   | 54%   | <a href="#">WP_080325039.1</a> |
| <input type="checkbox"/>                                                                                                                          | <a href="#">hypothetical protein BROFUL_02012 [Candidatus Brocadia fulgida]</a>                    | 320       | 1823        | 76%         | 2e-98   | 55%   | <a href="#">KKO19281.1</a>     |
| <input type="checkbox"/>                                                                                                                          | <a href="#">hypothetical protein A2Y09_02495 [Planctomycetes bacterium GWA2_39_15]</a>             | 314       | 314         | 70%         | 1e-97   | 49%   | <a href="#">OHB35490.1</a>     |
| <input type="checkbox"/>                                                                                                                          | <a href="#">hypothetical protein AYP45_15535 [Candidatus Brocadia caroliniensis]</a>               | 318       | 2802        | 77%         | 1e-97   | 54%   | <a href="#">OOP55314.1</a>     |

**Figure S8.** Printscreen of the results of the BLAST search with sequence WP\_070066018.1 with the BLAST tool from NCBI. The protein was found in different “*Ca. Brocadia*” species with identities between 54% and 72%.
